# Supplementary material for: LncRSPH9-4 Facilitates Meningitic Escherichia coli-Caused Blood–Brain Barrier Disruption via miR-17-5p/MMP3 Axis
Source: Int J Mol Sci. 2021 Jun 14;22(12):6343. doi: 10.3390/ijms22126343 (PMC8231991; doi:10.3390/ijms22126343)
Supplement: Supplementary file 1 [file ijms-22-06343-s001.zip › Supplementary Figures .pdf]

Supplement Figures

A

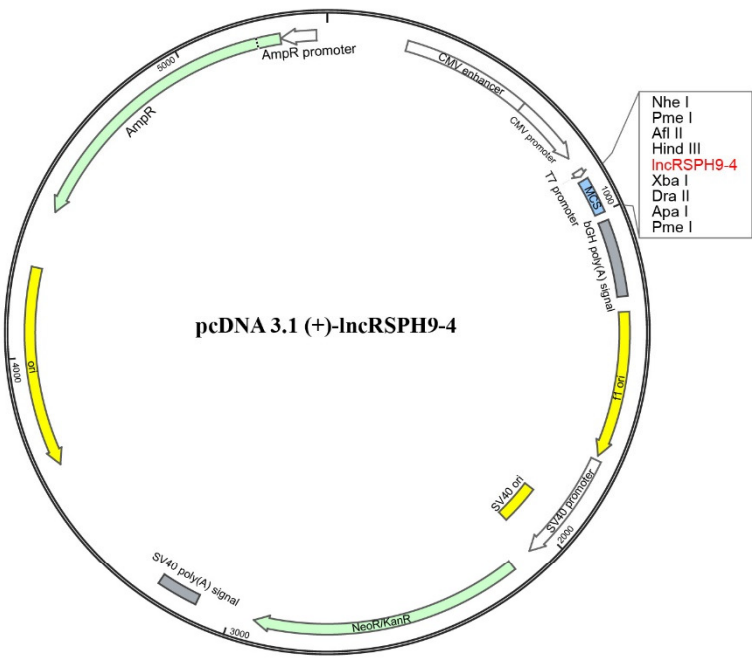

B

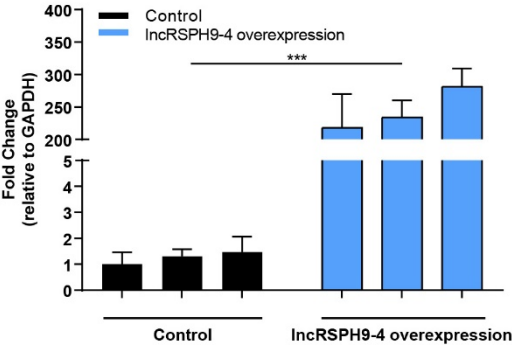

**Figure S1.** The construction and transfection efficiency of the lncRSPH9-4 overexpression plasmid in hBMECs. (A) Construction schematic of the lncRSPH9-4 in pcDNA3.1(+). (B) The qPCR analysis of the transfection efficiency of the lncRSPH9-4 overexpression plasmid in hBMECs. The X-axis represents three replicates of the lncRSPH9-4 overexpressed hBMECs and three control cells.



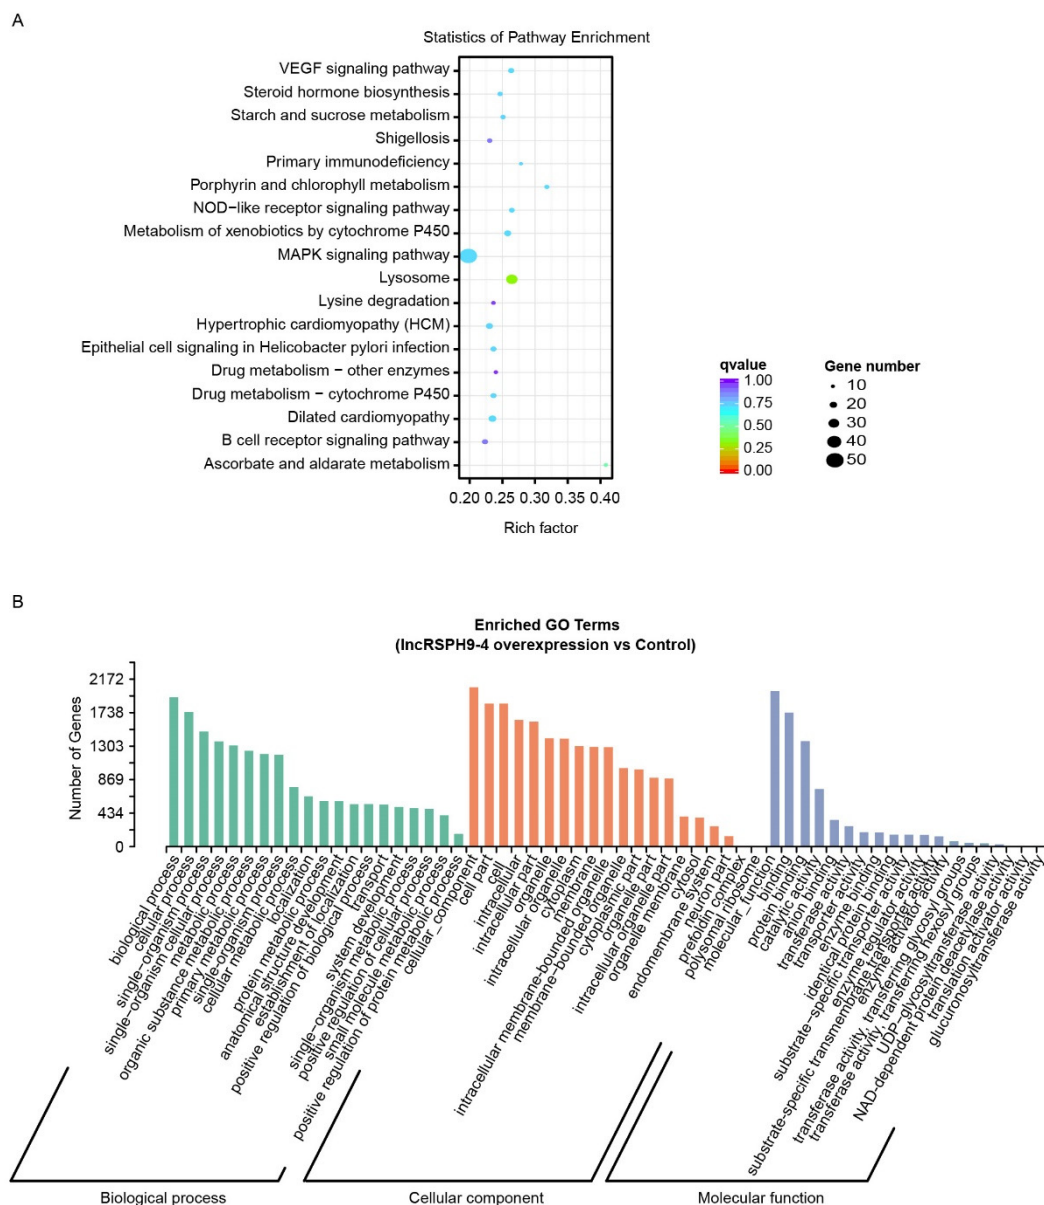

**Figure S3.** The KEGG and GO enrichment analyses presenting the differential mRNA targets of the differential miRNAs in hBMECs with lncRSPH9-4 overexpression. (A) KEGG pathway enrichment of the differential mRNA targets of those differential miRNAs. (B) GO enrichment analysis of the differentially expressed mRNA targets of those differential miRNAs.
