# Supplementary material for: LncRSPH9-4 Facilitates Meningitic Escherichia coli-Caused Blood–Brain Barrier Disruption via miR-17-5p/MMP3 Axis
Source: Int J Mol Sci. 2021 Jun 14;22(12):6343. doi: 10.3390/ijms22126343 (PMC8231991; doi:10.3390/ijms22126343)
Supplement: Supplementary file 1 [file ijms-22-06343-s001.zip › Suuplementary Table S1.pdf]

**Supplementary Table S1 Primers used for miRNA qPCR**

| Primers | Nucleotide sequence (5'-3') | Amplified fragments |
|---------|-----------------------------|---------------------|
| P1      | TTCACAGTGGCTAAGTTCTGC       | has-miR-27b-3p      |
| P2      | CAAAGTGCTGTTTCGTGCAGGTAG    | has-miR-93-5p       |
| P3      | TGTAAACATCCTACACTCAGCT      | hsa-miR-30b-5p      |
| P4      | AGGGACTTTTGGGGGCAGATGTG     | hsa-miR-365a-5p     |
| P5      | TGTTGGGATTCAGCAGGACCAT      | hsa-miR-4425        |
| P6      | CAGTGCCTCGGCAGTGCAGCCC      | hsa-miR-33b-3p      |
| P7      | AGCCCCTGCCCACCGCACACTG      | hsa-miR-210-5p      |
| P8      | CAAAGTGCTTACAGTGCAGGTAG     | hsa-miR-17-5p       |
| P9      | TCTTTGGTTATCTAGCTGTATGA     | hsa-miR-9-5p        |
| P10     | CAATGTTTCCACAGTGCATCAC      | hsa-miR-33a-3p      |
| P11     | TTGATCTCGGAAGCTAAGC         | hsa-miR-7641        |
| P12     | CTCTCTACTGACTTGCAACATA      | hsa-miR-4684-5p     |
| P13     | AGGTTGGGATCGGTTGCAATGCT     | hsa-miR-92a-1-5p    |
| P14     | AGTTCTTCAGTGGCAAGCTTTA      | hsa-miR-22-5p       |
| P15     | AGCCAGGCTCTGAAGGGAAAGT      | hsa-miR-4755-3p     |
| P16     | TTTCCCTTCAGAGCCTGGCTTT      | hsa-miR-4755-5p     |
| P17     | TGAGAACTGAATTCCATGGGTT      | hsa-miR-146a-5p     |
| P18     | CATCTTACTGGGCAGCATTGGA      | hsa-miR-200b-5p     |
| P19     | GCTGGTTTCATATGGTGGTTTAGA    | hsa-miR-29b-1-5p    |
| P20     | AAAAGCTGGGTTGAGAGGGT        | hsa-miR-320c        |
